# Supplementary material for: Stable Soil Moisture Alleviates Water Stress and Improves Morphogenesis of Tomato Seedlings
Source: MDPI journal article supplement (doi:10.3390/horticulturae9030391), 2023-03-17
Supplement: s1 [file s1]

Archive with 1 entries (1 files):
- horticulturae-2251816-supplementary.pdf
