# Supplementary material for: Stable Soil Moisture Alleviates Water Stress and Improves Morphogenesis of Tomato Seedlings
Source: MDPI journal article supplement (doi:10.3390/horticulturae9030391), 2023-03-17
Supplement: s1 [file s1 › horticulturae-2251816-supplementary.pdf]

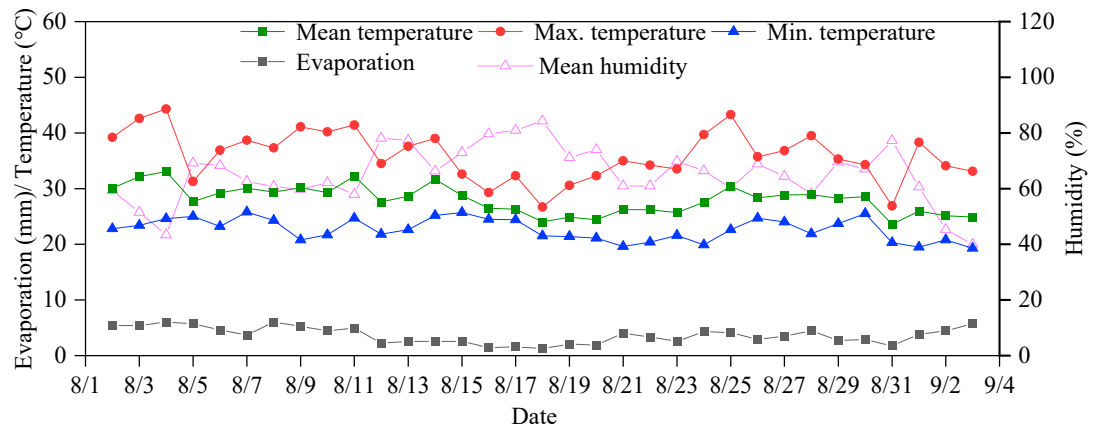

**Figure S1.** Daily changes in temperature, humidity and the evaporation of the surface water during the test period.

**Table S1.** Eigenvalues and variances of principal component analysis.

| Principal Component Number | Eigenvalue | Percentage of Variance (%) | Cumulative (%) |
|----------------------------|------------|----------------------------|----------------|
| PC1                        | 32.72      | 68.16                      | 68.16          |
| PC2                        | 4.43       | 9.23                       | 77.40          |
| PC3                        | 3.28       | 6.83                       | 84.22          |
| PC4                        | 1.81       | 3.77                       | 88.00          |
| PC5                        | 1.69       | 3.52                       | 91.51          |
| PC6                        | 1.25       | 2.60                       | 94.11          |

Note: The data used in the PCA were the data from 21 days after treatment. PCn indicated the extracted principal component.
